# Supplementary material for: Colorimetric sensor for cimetidine detection in human urine based on d-xylose protected gold nanoparticles
Source: Royal Society of Chemistry journal article supplement (doi:10.1039/c8an00499d), 2018-01-01
Supplement: c8an00499d1.pdf [file c8an00499d1.pdf]

## Supporting information

### Caption:

- 1、Gold nanoparticles modified by different concentrations of D-xylose.
- 2、The effect of different various experimental parameters and the comparative study on the detection of Cim by using citrated capped AuNPs and D-x@AuNPs.
- 3、The effect of different pH on the detection and its ultraviolet absorption spectrum.
- 4、The effect of different temperature on the detection and its ultraviolet absorption spectrum.

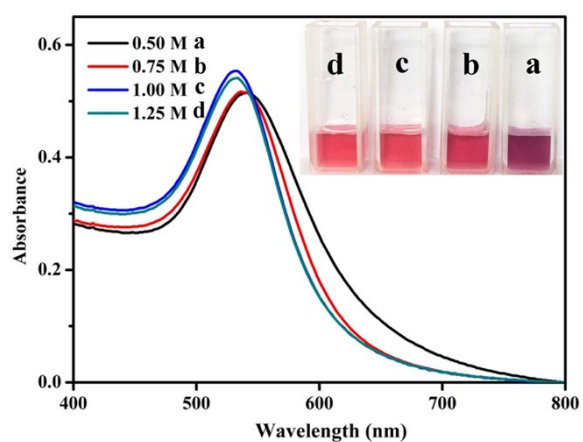

Fig. S1 Gold nanoparticles modified by different concentrations of D-xylose

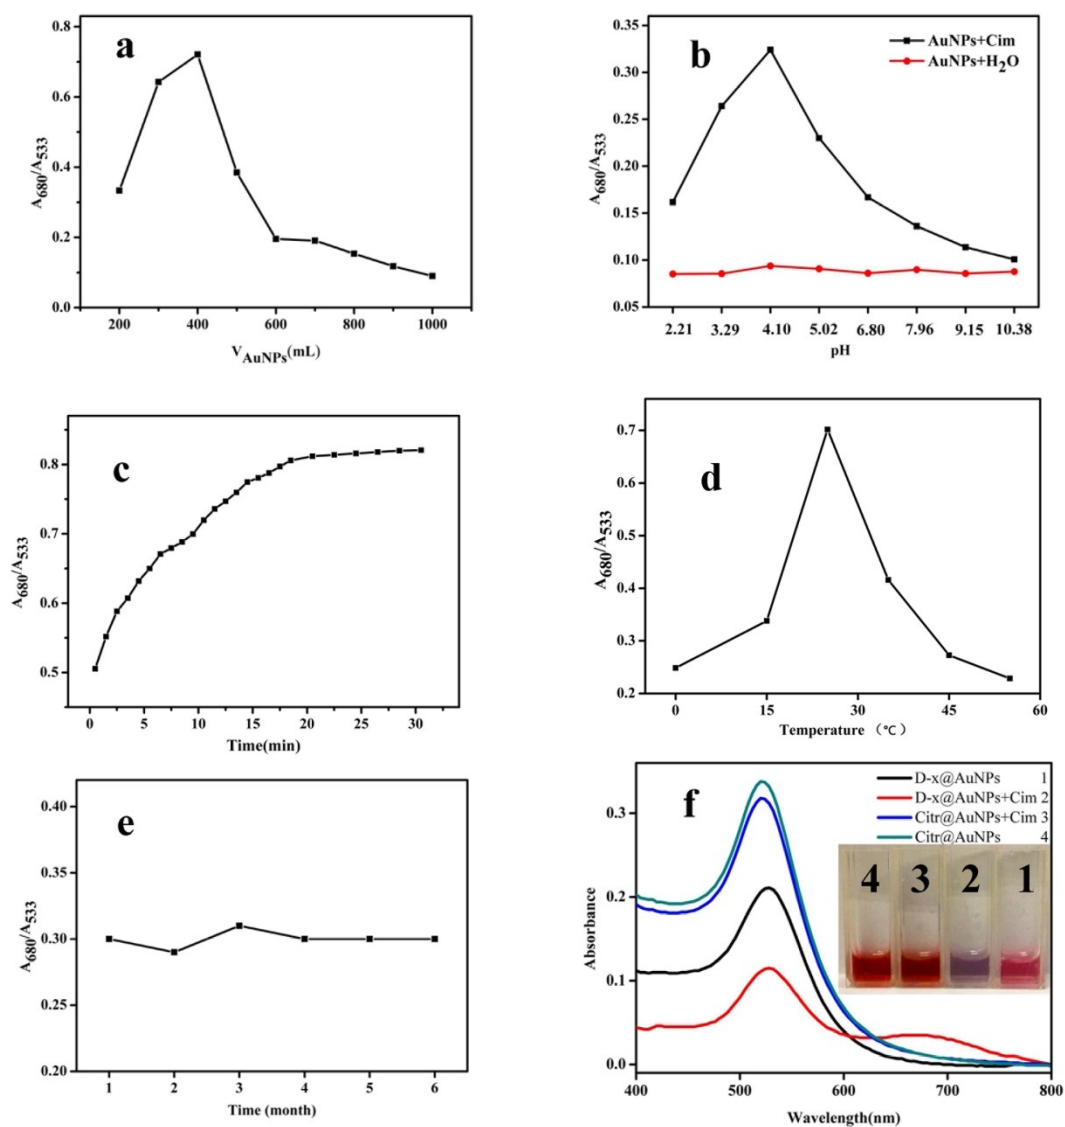

Fig. S2. (a) Effect of the amount of AuNPs, (b) pH, (c) incubation time, (d) temperature on  $A_{680}/A_{533}$  ratio of the system. The concentration of Cim was  $4 \times 10^{-7}$  M. (e) The absorption values at 533 nm of D-x@AuNPs over 6 months period. (f) UV-vis absorption spectra of (1) D-x@AuNPs, (2) D-x@AuNPs with Cim ( $5 \times 10^{-7}$  M) (3) Citr@AuNPs with Cim ( $5 \times 10^{-7}$  M) and (4) Citr@AuNPs.

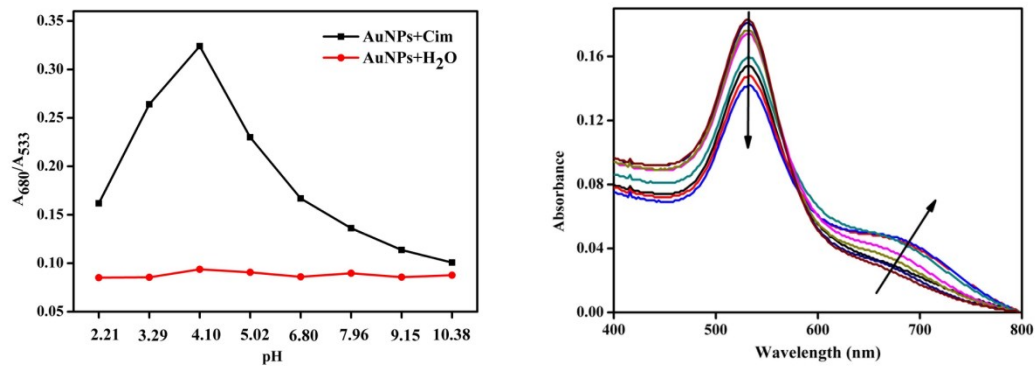

Fig.S3 The effect of different pH on the detection and its ultraviolet absorption spectrum.

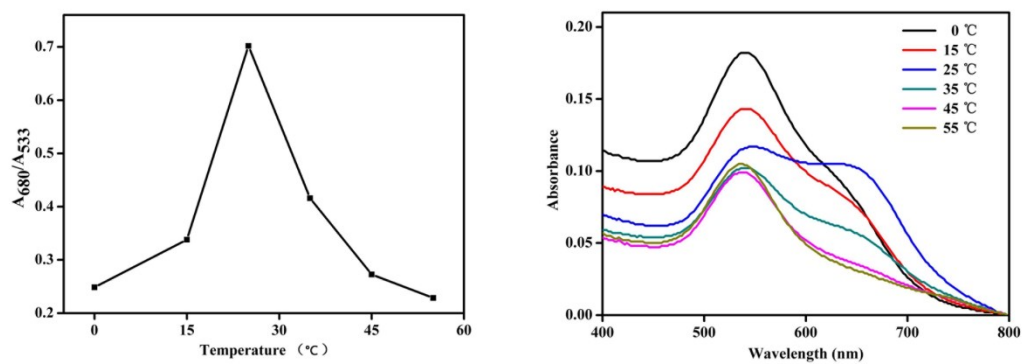

Fig.S4 The effect of different temperature on the detection and its ultraviolet absorption spectrum.
